# Supplementary material for: The Chemopreventive Efficacies of Nonsteroidal Anti-inflammatory Drugs: The Relationship of Short-term Biomarkers to Long-term Skin Tumor Outcome
Source: Oxford University Press journal article supplement (doi:10.1158/1940-6207.capr-13-0064), 2013-05-16
Supplement: 19406207capr130064-sup-supp_table_1.pdf [file 19406207capr130064-sup-supp_table_1.pdf]

**Supplemental Table 1. Effect of NSAIDs on UV-induced Epidermal Thickness and Apoptosis**

| Agent       | Dose (ppm) | Epidermal Thickness     | % of UV Control | % Caspase-3 positive cells | % of UV Control |
|-------------|------------|-------------------------|-----------------|----------------------------|-----------------|
| no UV       | --         | 15.5 ± 1.2 <sup>a</sup> | 33.7            | 0.10 ± 0.24 <sup>a</sup>   | 0.5             |
| UV          | --         | 46.0 ± 1.1              | 100.0           | 19.30 ± 2.44               | 100.0           |
|             |            |                         |                 |                            |                 |
| Indo + UV   | 4          | --                      | --              | --                         | --              |
| Nap + UV    | 100        | 28.2 ± 1.0 <sup>a</sup> | 61.3            | 10.48 ± 2.68 <sup>a</sup>  | 54.3            |
| Nap + UV    | 400        | 27.6 ± 1.5 <sup>a</sup> | 60.0            | 10.85 ± 5.66 <sup>a</sup>  | 56.2            |
| NO-Nap + UV | 100        | 37.3 ± 1.5 <sup>a</sup> | 81.1            | 6.88 ± 5.95 <sup>a</sup>   | 35.6            |
| NO-Nap + UV | 400        | 32.4 ± 2.1 <sup>a</sup> | 70.4            | 5.07 ± 2.74 <sup>a</sup>   | 26.3            |
| Asp + UV    | 60         | 27.2 ± 1.8 <sup>a</sup> | 59.1            | 7.32 ± 2.28 <sup>a</sup>   | 37.9            |
| Asp + UV    | 750        | 31.1 ± 4.0 <sup>b</sup> | 57.6            | 1.28 ± 1.36 <sup>a</sup>   | 6.6             |
| NO-Asp + UV | 108        | 30.4 ± 4.0 <sup>b</sup> | 66.1            | 1.16 ± 0.70 <sup>a</sup>   | 6.0             |
| NO-Asp + UV | 1350       | 35.7 ± 5.2 <sup>b</sup> | 77.6            | 2.20 ± 1.93 <sup>a</sup>   | 8.8             |
| Sul + UV    | 25         | 41.0 ± 1.0 <sup>a</sup> | 89.1            | 3.62 ± 1.28 <sup>a</sup>   | 18.8            |
| Sul + UV    | 75         | --                      | --              | 3.12 ± 3.13 <sup>a</sup>   | 16.2            |
| Sul + UV    | 150        | 32.7 ± 2.9 <sup>a</sup> | 71.1            | 4.52 ± 1.57 <sup>a</sup>   | 23.3            |

Groups of 3-4 mice fed their respective experimental diets for 1week were exposed to 220 mJ/cm<sup>2</sup> UV (except the no UV group) and killed 24 and 48 hrs later. Sections of skin were processed for immunohistochemical staining for cleaved caspase-3. The number of caspase-3 positive basal cells and total number of basal cells per field were counted in the 24 hr group. The values represent the mean percentage of positive basal cells ± std. dev. Skin from the 48 hr treatment group was used to measure epidermal thickness (µm). The UV control was statistically significantly different (p<0.01) from the no UV group. All other groups were compared to the UV only group. The statistical differences are shown by superscripts: a, p<0.01; b, p<0.05.
